# Supplementary material for: Rapid neurotransmitter uncaging in spatially defined patterns
Source: Springer Nature journal article supplement (doi:10.1038/nmeth793), 2005-10-21
Supplement: nmeth793-S1.pdf [file nmeth793-S1.pdf]

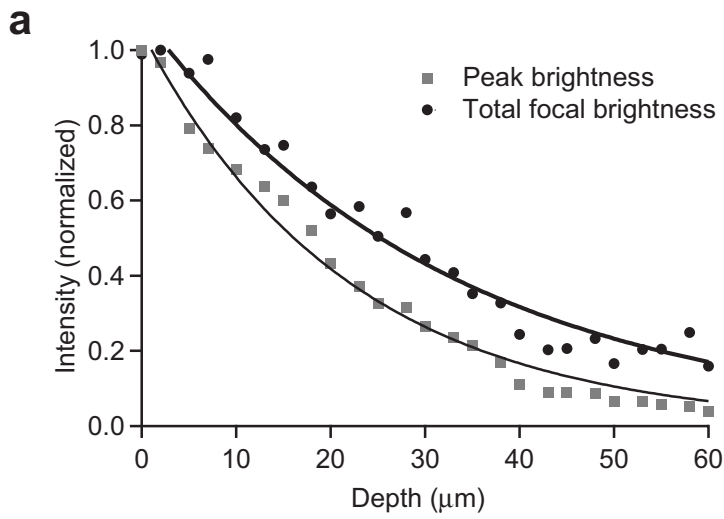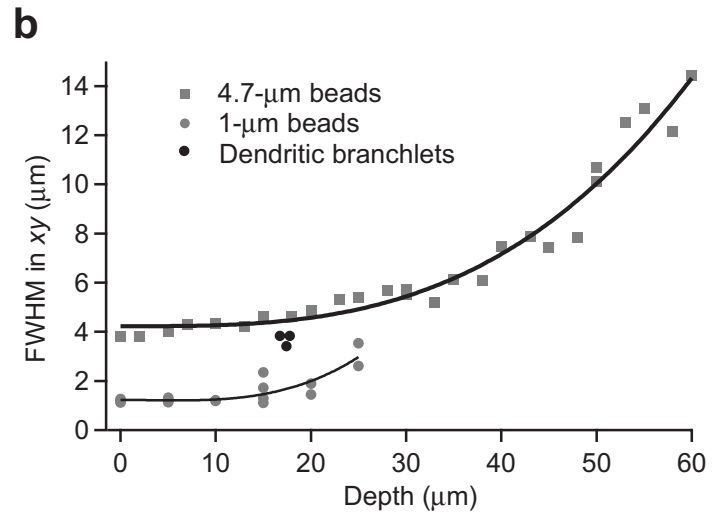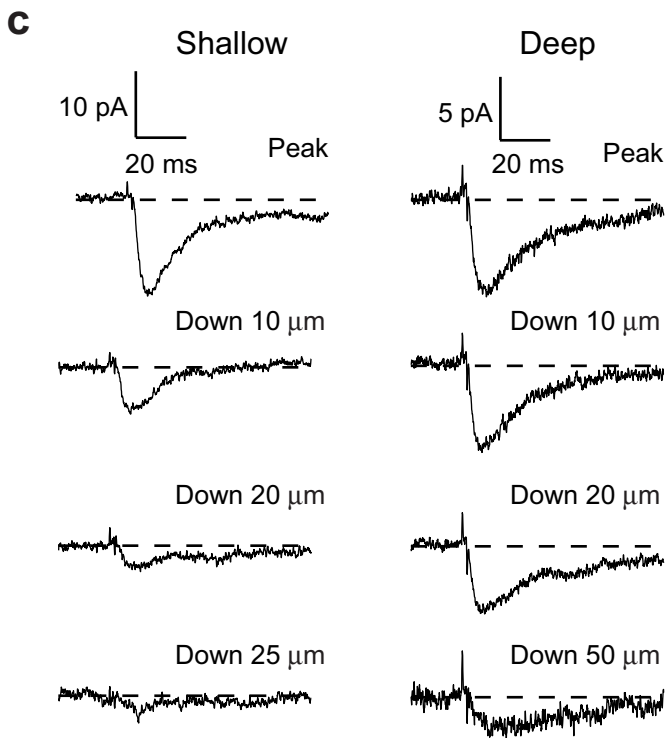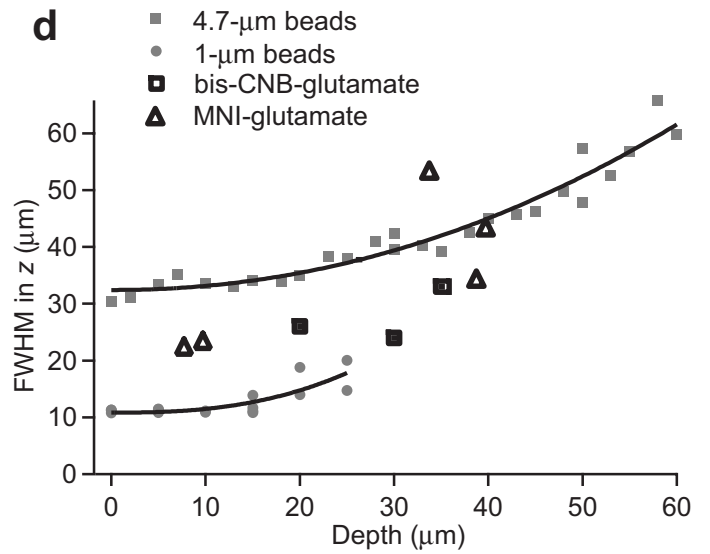

**Supplementary Figure 1. Axial and lateral resolution depends on depth in brain slices.** **a**, Bead (4.7  $\mu\text{m}$ ) fluorescence decreases with depth within the molecular layer of a cerebellar brain slice. Peak fluorescence was defined as the peak of a Gaussian fitted to a 3D image of a bead at a given depth. Total focal brightness was defined as the peak fluorescence times the width of the 3D Gaussian fit. **b**, Lateral full-width half-maximum (FWHM) resolution at various depths for 1  $\mu\text{m}$  and 4.7  $\mu\text{m}$  bead fluorescence and uncaging of MNI-glutamate on dendritic branchlets of CA1 pyramidal cells. **c**, Average voltage-clamp responses from MNI-glutamate uncaging on CA1 pyramidal cells on a shallow (8  $\mu\text{m}$  from surface) dendrite and a deep (40  $\mu\text{m}$ ) dendrite. Response amplitudes decrease as the uncaging volume is moved downward. **d**, Axial FWHM resolution at various depths for 1  $\mu\text{m}$  and 4.7  $\mu\text{m}$  beads and for double-caged (bis-CNB) and single-caged (MNI) glutamate.
